# Supplementary material for: Synaptic circuitry of identified neurons in the antennal lobe of Drosophila melanogaster
Source: PubMed Central journal article supplement (PMC6680330; doi:10.1002/cne.23966), 2016-03-09

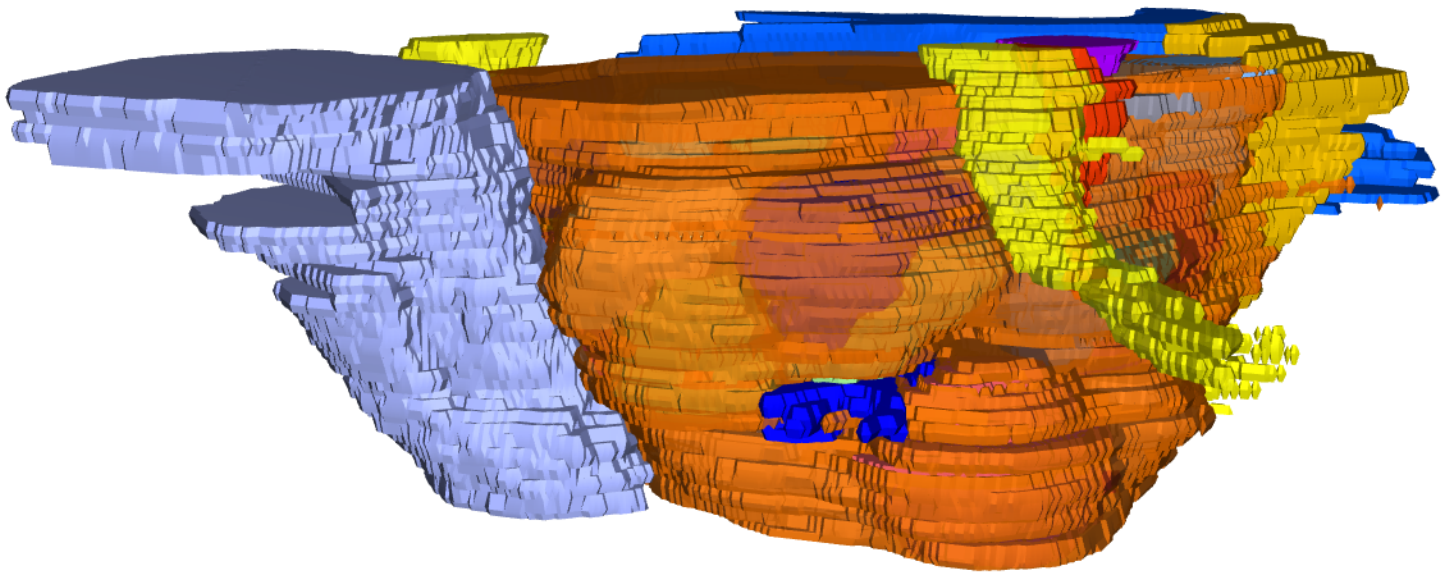

Supplement: CNE-524-1920-s002.pdf [file CNE-524-1920-s002.pdf]
