# Supplementary material for: Synaptic circuitry of identified neurons in the antennal lobe of Drosophila melanogaster
Source: PubMed Central journal article supplement (PMC6680330; doi:10.1002/cne.23966), 2016-03-09
Supplement: CNE-524-1920-s003.pdf [file CNE-524-1920-s003.pdf]

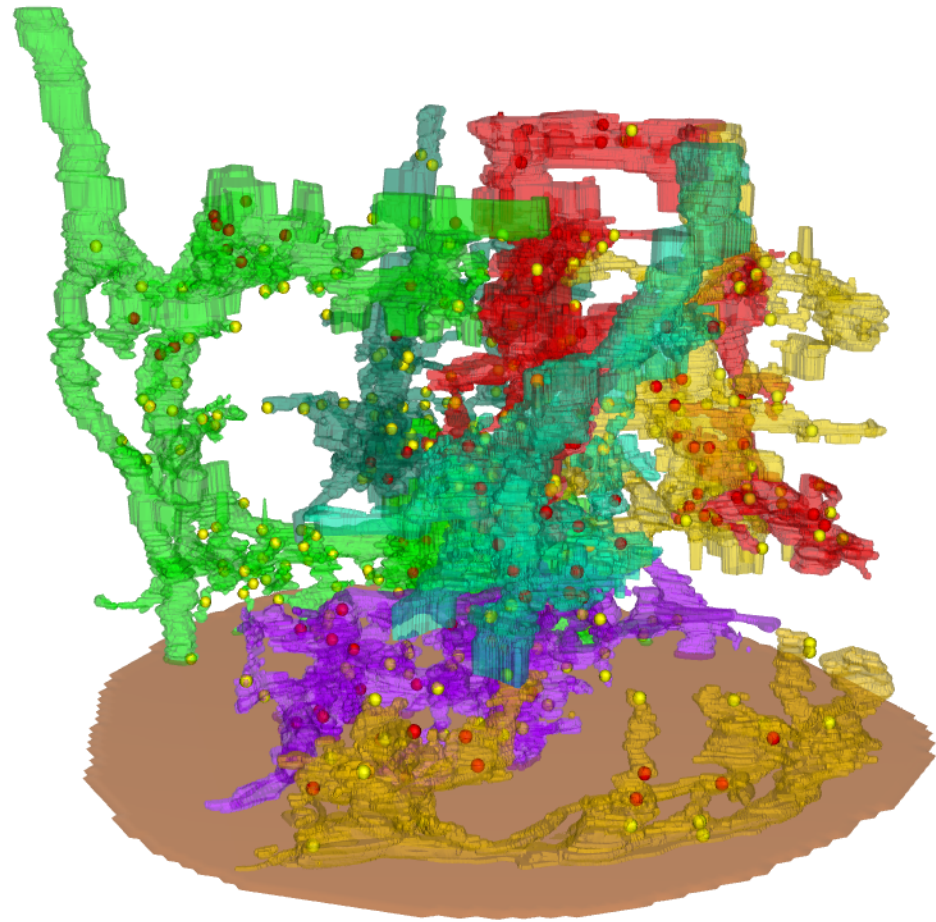

**Table S3-1 VA7-PN synaptic inventory**

|    | PN           | vol ( $\mu\text{m}^3$ ) | surf ( $\mu\text{m}^2$ ) | pre        | post       | total      | ratio       | sy/ $\mu\text{m}^3$ | pre         | post        | sy/ $\mu\text{m}^2$ | pre         | post        | id   |
|----|--------------|-------------------------|--------------------------|------------|------------|------------|-------------|---------------------|-------------|-------------|---------------------|-------------|-------------|------|
| 1  | PN1a         | 4.63                    | 44.90                    | 9          | 14         | 23         | 0.64        | 4.75                | 1.94        | 3.02        | 0.51                | 0.20        | 0.31        | 535  |
| 2  | PN1b         | 3.29                    | 38.88                    | 9          | 14         | 23         | 0.64        | 6.99                | 2.74        | 4.26        | 0.59                | 0.23        | 0.36        | 541  |
| 3  | PN1c         | 7.29                    | 56.30                    | 4          | 10         | 14         | 0.40        | 1.92                | 0.55        | 1.37        | 0.25                | 0.07        | 0.18        | 495  |
| 4  | PN2a         | 4.23                    | 44.61                    | 4          | 16         | 20         | 0.25        | 4.73                | 0.95        | 3.78        | 0.45                | 0.09        | 0.36        | 537  |
| 5  | PN3          | 4.85                    | 59.12                    | 11         | 20         | 31         | 0.55        | 6.39                | 2.27        | 4.12        | 0.52                | 0.19        | 0.34        | 492  |
| 6  | PN4          | 15.56                   | 161.89                   | 30         | 82         | 112        | 0.37        | 7.20                | 1.93        | 5.27        | 0.69                | 0.19        | 0.51        | 496  |
| 7  | PN4a         | 6.27                    | 61.26                    | 15         | 17         | 32         | 0.88        | 5.10                | 2.39        | 2.71        | 0.52                | 0.24        | 0.28        | 1642 |
| 8  | PN5          | 5.04                    | 63.26                    | 9          | 48         | 57         | 0.19        | 11.31               | 1.79        | 9.52        | 0.90                | 0.14        | 0.76        | 2220 |
| 9  | PN5a         | 6.69                    | 65.31                    | 16         | 28         | 44         | 0.57        | 6.58                | 2.39        | 4.19        | 0.67                | 0.24        | 0.43        | 1132 |
| 10 | PN5(c)       | 2.02                    | 27.18                    | 5          | 30         | 35         | 0.17        | 17.33               | 2.48        | 14.85       | 1.29                | 0.18        | 1.10        | 494  |
| 11 | PN7          | 9.40                    | 104.37                   | 16         | 59         | 75         | 0.27        | 7.98                | 1.70        | 6.28        | 0.72                | 0.15        | 0.57        | 1650 |
| 12 | PN7c         | 7.56                    | 64.81                    | 2          | 15         | 17         | 0.13        | 2.25                | 0.26        | 1.98        | 0.26                | 0.03        | 0.23        | 497  |
| 13 | PN9          | 3.84                    | 41.14                    | 13         | 20         | 33         | 0.65        | 8.59                | 3.39        | 5.21        | 0.80                | 0.32        | 0.49        | 558  |
| 14 | PN13         | 8.07                    | 93.97                    | 16         | 48         | 64         | 0.33        | 7.93                | 1.98        | 5.95        | 0.68                | 0.17        | 0.51        | 1506 |
| 15 | PN14         | 1.27                    | 16.04                    | 1          | 20         | 21         | 0.05        | 16.54               | 0.79        | 15.75       | 1.31                | 0.06        | 1.25        | 1978 |
| 16 | PN16         | 3.13                    | 36.60                    | 1          | 43         | 44         | 0.02        | 14.06               | 0.32        | 13.74       | 1.20                | 0.03        | 1.17        | 2480 |
| 17 | PN17         | 2.07                    | 22.05                    | 4          | 10         | 14         | 0.40        | 1.93                | 4.83        | 0.18        | 0.63                | 0.18        | 2.21        | 644  |
|    | <b>total</b> | <b>95.21</b>            | <b>1001.69</b>           | <b>165</b> | <b>494</b> | <b>659</b> | <b>0.33</b> | <b>6.92</b>         | <b>1.73</b> | <b>5.19</b> | <b>0.66</b>         | <b>0.16</b> | <b>0.49</b> |      |

vol: neurite volume; surf: neurite surface; total: number of all synapses counted per profile; pre: presynaptic site (output synapse) post: postsynaptic site (input synapse); ratio: number of out-to-input synapses; sy: synapse; sy/ $\mu\text{m}^3$ : volumetric density ;sy/ $\mu\text{m}^2$ : surface density

**Table S3-2 VA7-PN synaptic configuration**

| config | PN1a | PN1b | PN1c | PN2a | PN3  | PN4a | PN4  | PN5  | PN5a | PN5(c) | PN7  | PN7c | PN9  | PN13 | PN14 | PN16 | PN17 |              | all PN     | percent       | sum         | percent       |       |
|--------|------|------|------|------|------|------|------|------|------|--------|------|------|------|------|------|------|------|--------------|------------|---------------|-------------|---------------|-------|
|        | pre  | pre  | pre  | pre  | pre  | pre  | pre  | pre  | pre  | pre    | pre  | pre  | pre  | pre  | pre  | pre  | pre  |              |            |               | targets     |               |       |
| 3      | 2    | 1    | 2    |      | 2    | 4    | 7    | 2    | 7    |        | 3    |      | 2    | 1    |      |      |      |              | 33         | 20.5%         | 99          | 15.4%         |       |
| 4      | 5    | 8    | 1    | 3    | 7    | 10   | 13   | 6    | 8    | 5      | 10   |      | 11   | 10   | 1    |      | 2    |              | 100        | 62.1%         | 400         | 62.1%         |       |
| 5      | 2    |      | 1    |      | 1    |      | 8    | 1    | 1    |        | 3    |      | 1    | 4    |      |      | 1    |              | 23         | 14.3%         | 115         | 17.9%         |       |
| 6      |      |      |      | 1    |      | 1    | 2    |      |      |        |      |      |      |      |      |      | 1    |              | 5          | 3.1%          | 30          | 4.7%          |       |
|        |      |      |      |      |      |      |      |      |      |        |      |      |      |      |      |      |      | <b>total</b> | <b>161</b> | <b>100.0%</b> | <b>644</b>  | <b>100.0%</b> |       |
| config | PN1a | PN1b | PN1c | PN2a | PN3  | PN4a | PN4  | PN5  | PN5a | PN5(c) | PN7  | PN7c | PN9  | PN13 | PN14 | PN16 | PN17 |              |            |               |             |               |       |
|        | post | post | post | post | post | post | post | post | post | post   | post | post | post | post | post | post | post |              |            |               |             |               |       |
| 3      |      |      |      |      |      | 7    | 19   |      |      |        | 13   |      |      | 10   |      |      |      |              | 49         | 22.8%         | 147         | 13.7%         |       |
| 4      | 2    |      | 2    |      |      | 6    | 28   |      |      | 2      | 18   |      |      | 12   |      | 2    |      |              | 72         | 33.5%         | 288         | 26.9%         |       |
| 5      |      | 2    |      |      |      | 3    | 15   |      |      |        | 14   |      |      | 12   |      |      |      |              | 46         | 21.4%         | 230         | 21.5%         |       |
| 6      |      |      |      |      |      |      | 9    |      |      | 2      | 4    |      |      | 2    |      | 1    |      |              | 18         | 8.4%          | 108         | 10.1%         |       |
| 7      |      |      |      |      |      |      | 3    |      |      | 1      | 1    |      |      | 2    |      | 1    |      |              | 8          | 3.7%          | 56          | 5.2%          |       |
| 8      | 1    | 1    |      |      |      |      | 1    |      | 1    |        | 1    |      |      |      |      | 2    |      |              | 7          | 3.3%          | 56          | 5.2%          |       |
| 9      |      |      |      | 1    | 1    |      | 1    |      |      | 1      |      |      |      |      |      | 1    |      |              | 5          | 2.3%          | 45          | 4.2%          |       |
| 10     |      |      |      |      |      |      | 2    |      |      |        |      |      |      |      |      |      |      |              | 2          | 0.9%          | 20          | 1.9%          |       |
| 11     |      |      |      |      |      |      |      |      |      |        |      |      |      |      |      | 1    |      |              | 1          | 0.5%          | 11          | 1.0%          |       |
| 12     |      |      |      |      |      |      |      |      |      |        |      |      |      |      |      | 1    |      |              | 1          | 0.5%          | 12          | 1.1%          |       |
| 13     |      |      |      |      |      |      |      |      |      |        |      |      |      |      |      |      |      |              | 0          | 0.0%          | 0           | 0.0%          |       |
| 14     |      |      |      |      |      |      |      |      |      |        |      |      |      | 2    |      |      |      |              | 2          | 0.9%          | 28          | 2.6%          |       |
| 15     |      |      |      |      |      |      | 1    | 1    |      |        |      |      |      |      |      |      |      |              | 2          | 0.9%          | 30          | 2.8%          |       |
| 20     |      |      |      |      |      |      | 1    |      |      |        |      |      |      |      | 1    |      |      |              | 2          | 0.9%          | 40          | 3.7%          |       |
|        |      |      |      |      |      |      |      |      |      |        |      |      |      |      |      |      |      | <b>total</b> | <b>215</b> | <b>100.0%</b> | <b>1071</b> | <b>100.0%</b> |       |
|        |      |      |      |      |      |      |      |      |      |        |      |      |      |      |      |      |      |              | < 7        | 185           | 86.0%       | 773           | 72.2% |
|        |      |      |      |      |      |      |      |      |      |        |      |      |      |      |      |      |      |              | > 6        | 30            | 14.0%       | 298           | 27.8% |
|        |      |      |      |      |      |      |      |      |      |        |      |      |      |      |      |      |      | config       |            | <b>PN4</b>    |             |               |       |
|        |      |      |      |      |      |      |      |      |      |        |      |      |      |      |      |      |      | 3            |            | 21            | 16.8%       | 63            | 11.6% |
|        |      |      |      |      |      |      |      |      |      |        |      |      |      |      |      |      |      | 4            |            | 52            | 41.6%       | 208           | 38.3% |
|        |      |      |      |      |      |      |      |      |      |        |      |      |      |      |      |      |      | 5            |            | 40            | 32.0%       | 200           | 36.8% |
|        |      |      |      |      |      |      |      |      |      |        |      |      |      |      |      |      |      | 6            |            | 12            | 9.6%        | 72            | 13.3% |
|        |      |      |      |      |      |      |      |      |      |        |      |      |      |      |      |      |      | <b>total</b> | 125        | 100.0%        | 543         | 100.0%        |       |

**config:** synaptic configuration, e.g. 4 = tetrad, **total:** number of configurations; **sum targets:** number of all postsynaptic profiles targeted by output synapses
