# Supplementary material for: Synaptic circuitry of identified neurons in the antennal lobe of Drosophila melanogaster
Source: PubMed Central journal article supplement (PMC6680330; doi:10.1002/cne.23966), 2016-03-09
Supplement: CNE-524-1920-s004.pdf [file CNE-524-1920-s004.pdf]

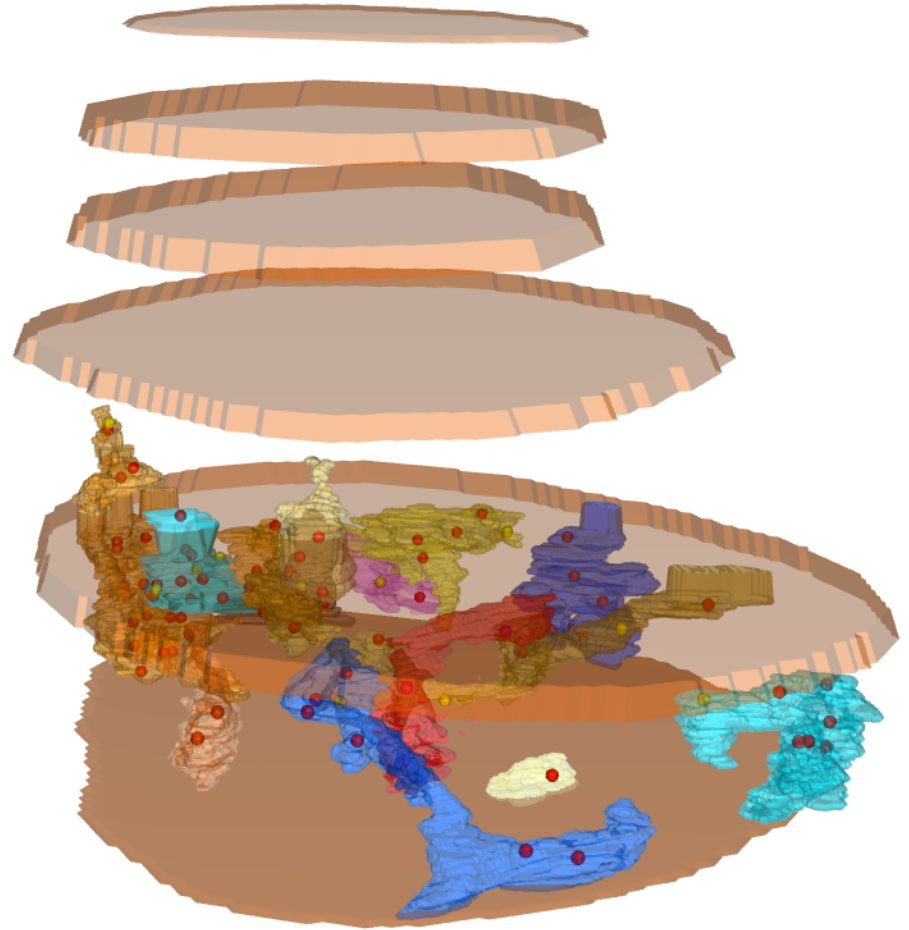

**Table S4-1 VA7-OSN synaptic inventory**

|    | OSN     | vol ( $\mu\text{m}^3$ ) | surf ( $\mu\text{m}^2$ ) | pre | post | total | ratio | sy/ $\mu\text{m}^3$ | pre  | post | sy/ $\mu\text{m}^2$ | pre  | post | id   |
|----|---------|-------------------------|--------------------------|-----|------|-------|-------|---------------------|------|------|---------------------|------|------|------|
| 1  | OSN1a-m | 1.23                    | 12.58                    | 5   | 1    | 6     | 5.0   | 4.88                | 4.07 | 0.81 | 0.48                | 0.40 | 0.08 | 1393 |
| 2  | OSN1b   | 1.08                    | 7.79                     | 3   | 0    | 3     |       | 2.78                | 2.78 | 0.00 | 0.39                | 0.39 | 0.00 | 1097 |
| 3  | OSN1c   | 5.84                    | 52.53                    | 26  | 2    | 28    | 13.0  | 4.79                | 4.45 | 0.34 | 0.53                | 0.49 | 0.04 | 628  |
| 4  | OSN2m   | 1.37                    | 12.87                    | 1   | 1    | 2     | 1.0   | 1.46                | 0.73 | 0.73 | 0.16                | 0.08 | 0.08 | 665  |
| 5  | OSN3a   | 1.92                    | 19.88                    | 6   | 1    | 7     | 6.0   | 3.65                | 3.13 | 0.52 | 0.35                | 0.30 | 0.05 | 530  |
| 7  | OSN4    | 2.03                    | 18.55                    | 4   | 1    | 5     | 4.0   | 2.46                | 1.97 | 0.49 | 0.27                | 0.22 | 0.05 | 663  |
| 1  | OSN11   | 2.90                    | 26.61                    | 6   | 3    | 9     | 2.0   | 3.10                | 2.07 | 1.03 | 0.34                | 0.23 | 0.11 | 1079 |
| 9  | OSN13   | 0.23                    | 3.22                     | 1   | 0    | 1     |       | 4.35                | 4.35 |      | 0.31                | 0.31 |      | 1429 |
| 10 | OSN14   | 1.19                    | 13.00                    | 4   | 0    | 4     |       | 3.36                | 3.36 |      | 0.31                | 0.31 |      | 1442 |
| 11 | OSN16   | 0.85                    | 8.34                     | 2   | 0    | 2     |       | 2.35                | 2.35 |      | 0.24                | 0.24 |      | 1512 |
| 12 | OSN17   | 2.43                    | 23.22                    | 6   | 1    | 7     | 6.0   | 2.88                | 2.47 | 0.41 | 0.30                | 0.26 | 0.04 | 1528 |
| 13 | OSN18   | 1.68                    | 17.08                    | 2   | 2    | 4     | 1.0   | 2.38                | 1.19 | 1.19 | 0.23                | 0.12 | 0.12 | 1811 |
| 14 | OSN19   | 1.32                    | 14.19                    | 6   | 1    | 7     | 6.0   | 5.30                | 4.55 | 0.76 | 0.49                | 0.42 | 0.07 | 1932 |
| 15 | OSN21   | 1.01                    | 10.43                    | 8   | 2    | 10    | 4.0   | 9.90                | 7.92 | 1.98 | 0.96                | 0.77 | 0.19 | 2432 |
|    | total   | 25.08                   | 240.29                   | 80  | 15   | 95    | 5.3   | 3.79                | 3.19 | 0.60 | 0.40                | 0.33 | 0.06 |      |

vol: neurite volume; surf: neurite surface; total: number of all synapses counted per profile; pre: presynaptic site (output synapse) post: postsynaptic site (input synapse); ratio: number of out-to-input synapses; sy: synapse; sy/ $\mu\text{m}^3$ : volumetric density; sy/ $\mu\text{m}^2$ : surface density

**Table S4-2 VA7-OSN synaptic configuration**

| config | OSN1a-m | ..1b | ..1c | ..2m | ..3a | ..4  | ..1  | ..3  | ..4  | ..16 | ..17 | ..18 | ..19 | ..21 |  | all PN       | percent   | sum targets  | percent    |              |
|--------|---------|------|------|------|------|------|------|------|------|------|------|------|------|------|--|--------------|-----------|--------------|------------|--------------|
|        | pre     | pre  | pre  | pre  | pre  | pre  | pre  | pre  | pre  | pre  | pre  | pre  | pre  | pre  |  | .            |           |              |            |              |
| 3      | 1       |      | 3    |      |      |      |      |      |      |      |      |      |      |      |  | 4            | 5.6%      | 12           | 2.62%      |              |
| 4      | 1       |      | 9    |      | 1    | 1    |      |      | 1    |      | 1    |      | 2    | 3    |  | 19           | 26.4%     | 76           | 16.59%     |              |
| 5      |         |      | 4    |      | 1    | 2    | 1    |      |      |      | 2    |      |      | 2    |  | 12           | 16.7%     | 60           | 13.10%     |              |
| 6      |         | 1    | 4    |      | 1    |      | 1    |      |      |      |      |      | 1    | 1    |  | 9            | 12.5%     | 54           | 11.79%     |              |
| 7      | 1       | 1    | 4    |      |      |      | 1    |      | 1    | 1    |      |      | 2    | 1    |  | 12           | 16.7%     | 84           | 18.34%     |              |
| 8      |         |      |      |      |      |      |      | 1    | 1    | 1    |      |      |      |      |  | 3            | 4.2%      | 24           | 5.24%      |              |
| 9      |         |      | 1    |      | 1    |      | 1    |      |      |      | 1    |      |      | 1    |  | 5            | 6.9%      | 45           | 9.83%      |              |
| 10     |         | 1    |      |      |      |      |      |      |      |      |      | 1    |      |      |  | 2            | 2.8%      | 20           | 4.37%      |              |
| 11     |         |      |      |      |      |      | 1    |      |      |      |      |      | 1    |      |  | 2            | 2.8%      | 22           | 4.80%      |              |
| 13     |         |      |      |      |      |      |      |      |      |      |      |      |      |      |  | 0            | 0.0%      | 0            | 0.00%      |              |
| 14     |         |      |      |      |      |      |      |      | 1    |      |      |      |      |      |  | 1            | 1.4%      | 14           | 3.06%      |              |
| 15     |         |      |      |      |      | 1    |      |      |      |      |      |      |      |      |  | 1            | 1.4%      | 15           | 3.28%      |              |
| 20     |         |      |      |      |      |      | 1    |      |      |      |      |      |      |      |  | 1            | 1.4%      | 20           | 4.37%      |              |
|        |         |      |      |      |      |      |      |      |      |      |      |      |      |      |  | <b>total</b> | <b>72</b> | <b>100 %</b> | <b>458</b> | <b>100 %</b> |
|        |         |      |      |      |      |      |      |      |      |      |      |      |      |      |  | < 7          | 44        | 61.1%        | 202        | 44.10%       |
|        |         |      |      |      |      |      |      |      |      |      |      |      |      |      |  | > 6          | 28        | 38.9%        | 256        | 55.90%       |
| config | OSN1a-m | ..1b | ..1c | ..2m | ..3a | ..4  | ..1  | ..3  | ..4  | ..16 | ..17 | ..18 | ..19 | ..21 |  | all PN       | percent   | sum targets  | percent    |              |
|        | post    | post | post | post | post | post | post | post | post | post | post | post | post | post |  |              |           |              |            |              |
| 4      |         |      |      | 1    | 1    |      | 2    |      |      |      |      |      |      |      |  | 4            | 30.8%     | 16           | 18.82%     |              |
| 5      |         |      | 1    |      |      | 1    |      |      |      |      |      |      |      |      |  | 2            | 15.4%     | 10           | 11.76%     |              |
| 6      |         |      | 1    |      | 1    |      | 1    |      |      |      | 1    |      | 1    |      |  | 5            | 38.5%     | 30           | 35.29%     |              |
| 9      |         |      |      |      | 1    |      |      |      |      |      |      |      |      |      |  | 1            | 7.7%      | 9            | 10.59%     |              |
| 20     |         |      |      |      |      |      |      |      |      |      |      |      | 1    |      |  | 1            | 7.7%      | 20           | 23.53%     |              |
|        |         |      |      |      |      |      |      |      |      |      |      |      |      |      |  | <b>total</b> | <b>13</b> | <b>100 %</b> | <b>85</b>  | <b>100 %</b> |
|        |         |      |      |      |      |      |      |      |      |      |      |      |      |      |  | < 7          | 11        | 84.6%        | 56         | 65.9%        |
|        |         |      |      |      |      |      |      |      |      |      |      |      |      |      |  | > 6          | 2         | 15.4%        | 114        | 34.1%        |

**config:** synaptic configuration, e.g. 4 = tetrad, **total:** number of configurations; **sum targets:** number of all postsynaptic profiles targeted by output synapses
