# Supplementary material for: Synaptic circuitry of identified neurons in the antennal lobe of Drosophila melanogaster
Source: PubMed Central journal article supplement (PMC6680330; doi:10.1002/cne.23966), 2016-03-09
Supplement: CNE-524-1920-s005.pdf [file CNE-524-1920-s005.pdf]

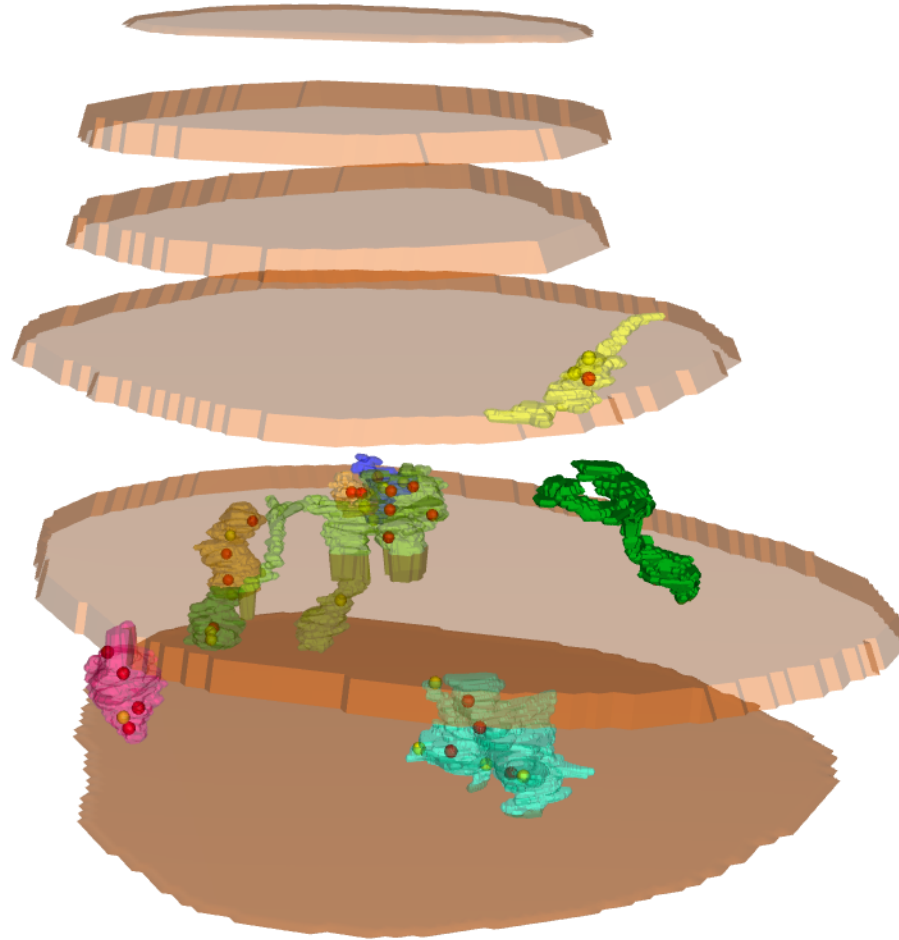

**Table S5-1 VA7-LN synaptic inventory**

|   | LN    | vol ( $\mu\text{m}^3$ ) | surf ( $\mu\text{m}^2$ ) | pre | post | total | ratio | sy/ $\mu\text{m}^3$ | pre   | post  | sy/ $\mu\text{m}^2$ | pre  | post | id   |
|---|-------|-------------------------|--------------------------|-----|------|-------|-------|---------------------|-------|-------|---------------------|------|------|------|
| 1 | LN1   | 1.32                    | 14.34                    | 5   | 1    | 6     | 5.0   | 4.55                | 3.79  | 0.76  | 0.42                | 0.35 | 0.07 | 2495 |
| 2 | LN2   | 0.79                    | 6.42                     | 4   | 1    | 5     | 4.0   | 6.33                | 5.06  | 1.27  | 0.78                | 0.62 | 0.16 | 2621 |
| 3 | LN3   | 0.25                    | 3.8                      | 1   | 2    | 3     | 0.5   | 12.00               | 4.00  | 8.00  | 0.79                | 0.26 | 0.53 | 2633 |
| 4 | LN4   | 0.12                    | 1.96                     | 1   | 3    | 4     | 0.3   | 33.33               | 8.33  | 25.00 | 2.04                | 0.51 | 1.53 | 2704 |
| 5 | LN5   | 0.12                    | 1.62                     | 2   | 1    | 3     | 2.0   | 25.00               | 16.67 | 8.33  | 1.85                | 1.23 | 0.62 | 2688 |
| 6 | LN6   | 0.66                    | 8.93                     | 2   | 3    | 5     | 0.7   | 7.58                | 3.03  | 4.55  | 0.56                | 0.22 | 0.34 | 2737 |
| 7 | LN7   | 1.55                    | 13.53                    | 4   | 4    | 8     | 1.0   | 5.16                | 2.58  | 2.58  | 0.59                | 0.30 | 0.30 | 2747 |
| 8 | LN8   | 0.4                     | 3.58                     | 1   | 3    | 4     | 0.3   | 10.00               | 2.50  | 7.50  | 1.12                | 0.28 | 0.84 | 2761 |
| 9 | LN9   | 0.58                    | 5.56                     | 3   | 2    | 5     | 1.5   | 8.62                | 5.17  | 3.45  | 0.90                | 0.54 | 0.36 | 3526 |
|   | total | 5.79                    | 59.74                    | 23  | 20   | 43    | 1.2   | 7.43                | 3.97  | 3.45  | 0.72                | 0.39 | 0.33 |      |

vol: neurite volume; surf: neurite surface; total: number of all synapses counted per profile; pre: presynaptic site (output synapse) post: postsynaptic site (input synapse); ratio: number of out-to-input synapses; sy: synapse; sy/ $\mu\text{m}^3$ : volumetric density ;sy/ $\mu\text{m}^2$ : surface density

**Table S5-2 VA7-LN synaptic configuration**

| configuration | LN1<br>pre  | LN2<br>pre  | LN3<br>pre  | LN4<br>pre  | LN5<br>pre  | LN6<br>pre  | LN7<br>pre  | LN8<br>pre  | LN9<br>pre  |               | all PN    | percent       | sum targets | percent       |
|---------------|-------------|-------------|-------------|-------------|-------------|-------------|-------------|-------------|-------------|---------------|-----------|---------------|-------------|---------------|
| 3             | 3           | 1           | 1           |             | 2           | 1           |             |             | 2           |               | 10        | 43.5%         | 30          | 36.6%         |
| 4             | 2           | 3           |             | 1           |             | 1           | 4           | 1           | 1           |               | 13        | 56.5%         | 52          | 63.4%         |
|               |             |             |             |             |             |             |             |             |             | <b>total</b>  | <b>23</b> | <b>100.0%</b> | <b>82</b>   | <b>100.0%</b> |
| configuration | LN1<br>post | LN2<br>post | LN3<br>post | LN4<br>post | LN5<br>post | LN6<br>post | LN7<br>post | LN8<br>post | LN9<br>post |               | sum       | percent       | sum         | percent       |
| 3             |             |             | 1           |             |             |             |             |             |             |               | 1         | 5.3%          | 3           | 3.3%          |
| 4             | 1           |             | 1           | 2           | 1           | 3           | 2           | 2           | 1           |               | 13        | 68.4%         | 52          | 57.1%         |
| 5             |             |             |             | 1           |             |             |             | 1           |             |               | 2         | 10.5%         | 10          | 11.0%         |
| 6             |             |             |             |             |             |             |             |             | 1           |               | 1         | 5.3%          | 6           | 6.6%          |
| 8             |             | 1           |             |             |             |             |             |             |             |               | 1         | 5.3%          | 8           | 8.8%          |
| 12            |             |             |             |             |             |             | 1           |             |             |               | 1         | 5.3%          | 12          | 13.2%         |
|               |             |             |             |             |             |             |             |             |             | <b>total</b>  | <b>19</b> | <b>100.0%</b> | <b>91</b>   | <b>100.0%</b> |
|               |             |             |             |             |             |             |             |             |             | <b>&lt; 7</b> | <b>17</b> | <b>89.5%</b>  | <b>71</b>   | <b>78.0%</b>  |
|               |             |             |             |             |             |             |             |             |             | <b>&gt; 6</b> | <b>2</b>  | <b>10.5%</b>  | <b>20</b>   | <b>22.0%</b>  |

**config:** synaptic configuration, e.g. 4 = tetrad, **total:** number of configurations; **sum targets:** number of all postsynaptic profiles targeted by output synapses
