# Supplementary material for: Synaptic circuitry of identified neurons in the antennal lobe of Drosophila melanogaster
Source: PubMed Central journal article supplement (PMC6680330; doi:10.1002/cne.23966), 2016-03-09
Supplement: CNE-524-1920-s006.pdf [file CNE-524-1920-s006.pdf]

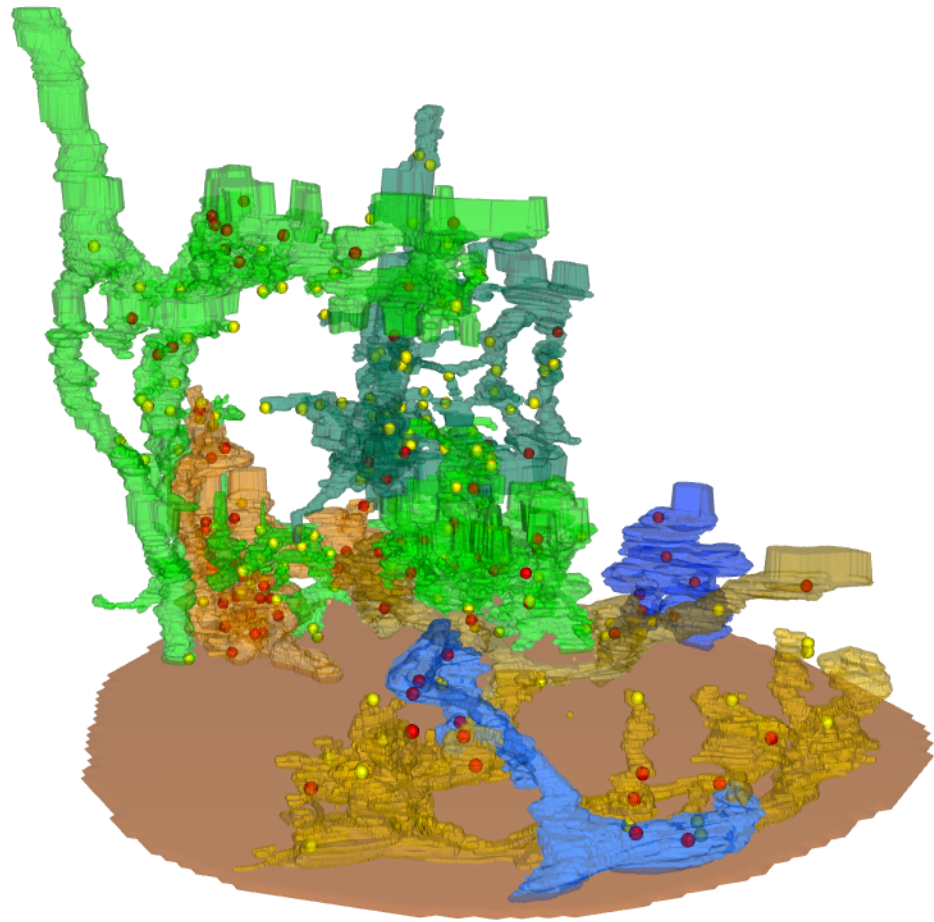

**Table S6-1 VA7: OSN – PN – LN connectivity**

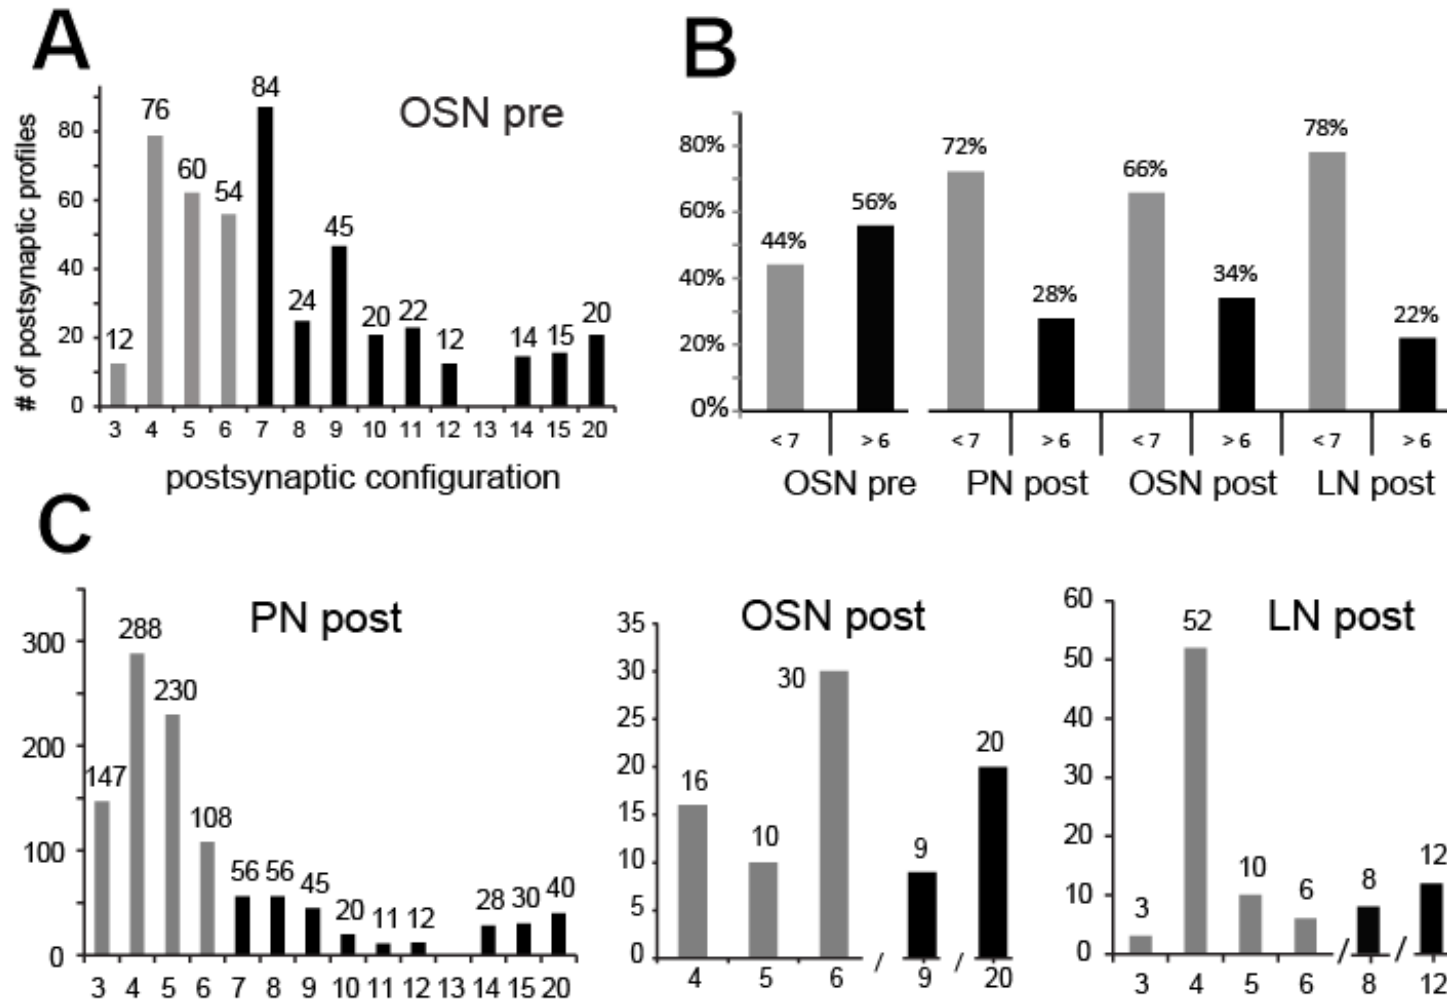

**pre:** presynaptic; **post:** postsynaptic; **PN:** projection neuron; **OSN:** putative olfactory sensory neuron; **LN:** putative local interneuron

**Table S6-2 Connectivity of VA7 cell types**

| pre  | connector | target | input to   |        |       |       |
|------|-----------|--------|------------|--------|-------|-------|
|      |           |        | N          | PN     | OSN   | LN    |
| PN4  | 30        | 125    | 99         | 21     | 4     | 1     |
|      |           |        | 79.20%     | 16.80% | 3.20% | 0.80% |
| OSN  | 73        | 465    | 152        | 308    | 2     | 2     |
|      |           |        | 32.7%      | 66.2%  | 0.4%  | 0.4%  |
| LN   | 23        | 81     | 43         | 32     | 3     | 3     |
|      |           |        | 53.1%      | 39.5%  | 3.7%  | 3.7%  |
| post |           |        | input from |        |       |       |
|      |           |        | N          | PN     | OSN   | LN    |
| PN4  | 80        | 390    | 351        | 9      | 26    | 3     |
|      |           |        | 90.00%     | 2.31%  | 6.67% | 0.77% |
| OSN  | 9         | 59     | 53         | 3      | 3     | 0     |
|      |           |        | 89.8%      | 5.1%   | 5.1%  | 0.0%  |
| LN   | 18        | 87     | 72         | 9      | 3     | 3     |
|      |           |        | 82.8%      | 10.3%  | 3.4%  | 3.4%  |

**pre:** presynaptic; **post:** postsynaptic; **target:** number of postsynaptic profiles targeted by a pre-synapse; **N:** non-identified profile **PN:** projection neuron; **OSN:** putative olfactory sensory neuron; **LN:** putative local interneuron
