# Supplementary material for: Synaptic circuitry of identified neurons in the antennal lobe of Drosophila melanogaster
Source: PubMed Central journal article supplement (PMC6680330; doi:10.1002/cne.23966), 2016-03-09
Supplement: CNE-524-1920-s007.pdf [file CNE-524-1920-s007.pdf]

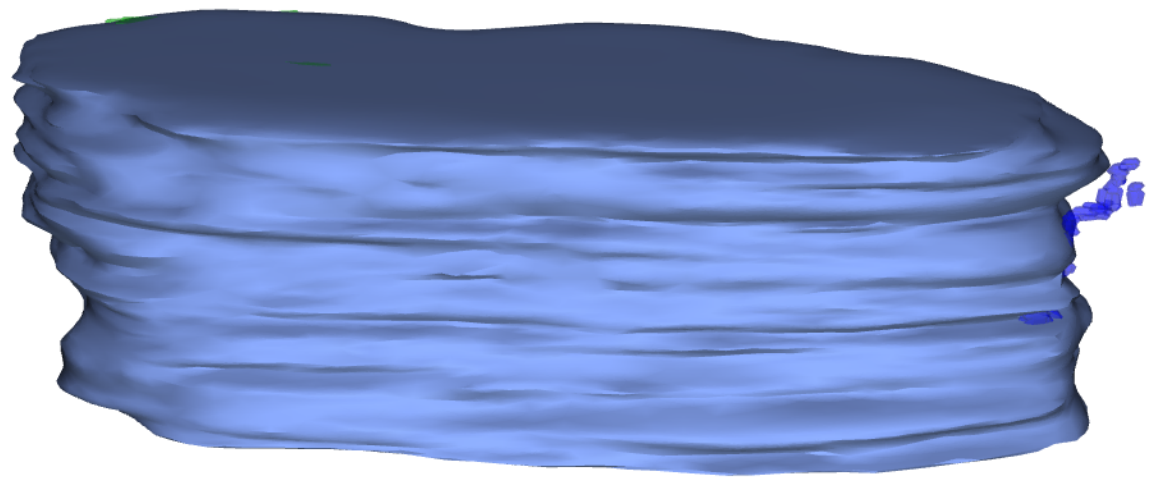

**Table S7-1 DL5 synaptic inventory**

|   | <b>PN</b>      | vol ( $\mu\text{m}^3$ ) | surf ( $\mu\text{m}^2$ ) | pre       | post       | total      | ratio        | sy/ $\mu\text{m}^3$ | pre         | post        | sy/ $\mu\text{m}^2$ | pre         | post        | id   |
|---|----------------|-------------------------|--------------------------|-----------|------------|------------|--------------|---------------------|-------------|-------------|---------------------|-------------|-------------|------|
| 1 | PN1            | 34.3                    | 252.21                   | 47        | 121        | 168        | 0.39         | 4.90                | 1.37        | 3.53        | 0.67                | 0.19        | 0.48        | 569  |
| 2 | PN2            | 14.88                   | 137.46                   | 21        | 67         | 88         | 0.31         | 5.91                | 1.41        | 4.50        | 0.64                | 0.15        | 0.49        | 749  |
|   | <b>all PN</b>  | <b>49.18</b>            | <b>389.67</b>            | <b>68</b> | <b>188</b> | <b>256</b> | <b>0.36</b>  | <b>5.21</b>         | <b>1.38</b> | <b>3.82</b> | <b>0.66</b>         | <b>0.17</b> | <b>0.48</b> |      |
|   | <b>OSN</b>     | vol ( $\mu\text{m}^3$ ) | surf ( $\mu\text{m}^2$ ) | pre       | post       | sum        | ratio        | sy/ $\mu\text{m}^3$ | pre         | post        | sy/ $\mu\text{m}^2$ | pre         | post        | id   |
| 1 | ON1            | 1.55                    | 19.44                    | 3         |            | 3          |              | 1.94                | 1.94        | 0.00        | 0.15                | 0.15        | 0.00        | 846  |
| 2 | OSN2           | 1.13                    | 11.92                    | 7         | 1          | 8          | 7.00         | 7.08                | 6.19        | 0.88        | 0.67                | 0.59        | 0.08        | 1533 |
|   | <b>all OSN</b> | <b>2.68</b>             | <b>31.36</b>             | <b>10</b> | <b>1</b>   | <b>11</b>  | <b>10.00</b> | <b>4.10</b>         | <b>3.73</b> | <b>0.37</b> | <b>0.35</b>         | <b>0.32</b> | <b>0.03</b> |      |

vol: neurite volume; surf: neurite surface; total: number of all synapses counted per profile; pre: presynaptic site (output synapse) post: postsynaptic site (input synapse); ratio: number of out-to-input synapses; sy: synapse; sy/ $\mu\text{m}^3$ : volumetric density ; sy/ $\mu\text{m}^2$ : surface density

**Table S7-2 DL5-PN synaptic configuration**

| config       | PN1        | PN2       |    | all PN     | percent       | sum targets | percent       |
|--------------|------------|-----------|----|------------|---------------|-------------|---------------|
|              | pre        | pre       |    |            |               |             |               |
| 3            | 14         | 4         |    | 18         | 27.3%         | 54          | 18.9%         |
| 4            | 11         | 11        |    | 22         | 33.3%         | 88          | 30.9%         |
| 5            | 14         | 3         |    | 17         | 25.8%         | 85          | 29.8%         |
| 6            | 4          | 1         |    | 5          | 7.6%          | 30          | 10.5%         |
| 7            | 2          | 2         |    | 4          | 6.1%          | 28          | 9.8%          |
| <b>total</b> | <b>45</b>  | <b>21</b> |    | <b>66</b>  | <b>100.0%</b> | <b>285</b>  | <b>100.0%</b> |
|              |            |           |    |            |               |             |               |
| config       | PN31       | PN32      |    |            |               |             |               |
|              | post       | post      |    |            |               |             |               |
| 2            | 13         |           |    | 13         | 8.2%          | 26          | 3.6%          |
| 3            | 28         |           |    | 28         | 17.6%         | 84          | 11.6%         |
| 4            | 34         | 6         |    | 40         | 25.2%         | 160         | 22.1%         |
| 5            | 25         | 20        |    | 45         | 28.3%         | 225         | 31.1%         |
| 6            | 11         | 7         |    | 18         | 11.3%         | 108         | 14.9%         |
| 7            | 4          | 2         |    | 6          | 3.8%          | 42          | 5.8%          |
| 8            | 3          | 2         |    | 5          | 3.1%          | 40          | 5.5%          |
| 9            | 1          | 2         |    | 3          | 1.9%          | 27          | 3.7%          |
| 10           |            |           |    |            |               |             |               |
| 11           |            | 1         |    | 1          | 0.6%          | 11          | 1.5%          |
| <b>total</b> | <b>119</b> | <b>40</b> |    | <b>159</b> | <b>100.0%</b> | <b>723</b>  | <b>100.0%</b> |
|              |            |           | <7 | <b>144</b> | <b>90.6%</b>  | <b>603</b>  | <b>83.4%</b>  |
|              |            |           | >6 | <b>15</b>  | <b>9.4%</b>   | <b>120</b>  | <b>16.6%</b>  |

**config:** synaptic configuration, e.g. 4 = tetrad, **total:** number of configurations; **sum targets:** number of all postsynaptic profiles targeted by output synapses
