# Supplementary material for: Synaptic circuitry of identified neurons in the antennal lobe of Drosophila melanogaster
Source: PubMed Central journal article supplement (PMC6680330; doi:10.1002/cne.23966), 2016-03-09
Supplement: CNE-524-1920-s008.pdf [file CNE-524-1920-s008.pdf]

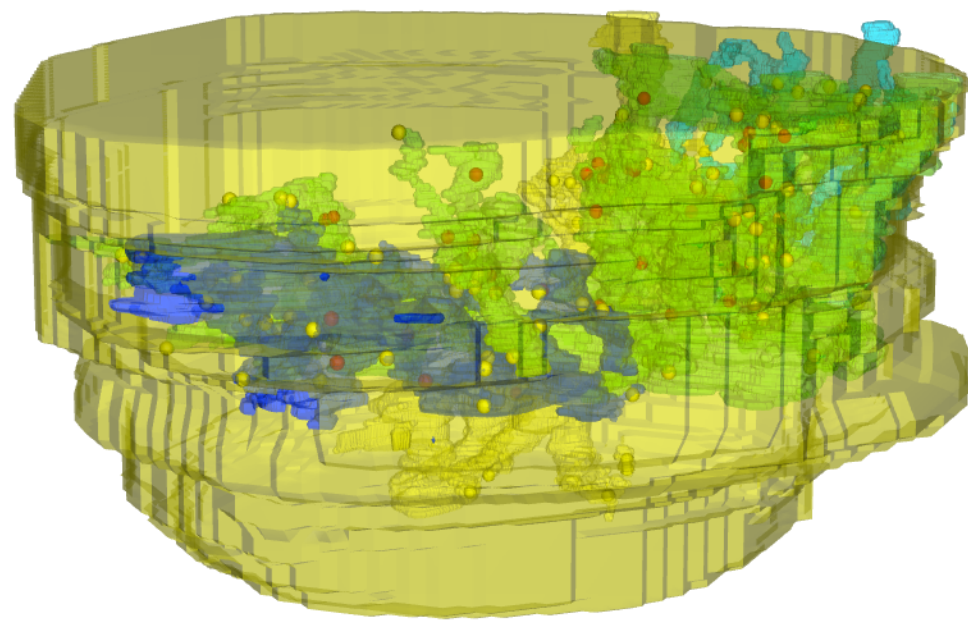

**Table S8-1 DM2 synaptic inventory**

|            |                | vol ( $\mu\text{m}^3$ ) | surf ( $\mu\text{m}^2$ ) | pre       | post       | total      | ratio       | sy/ $\mu\text{m}^3$ | pre         | post        | sy/ $\mu\text{m}^2$ | pre         | post        | id   |
|------------|----------------|-------------------------|--------------------------|-----------|------------|------------|-------------|---------------------|-------------|-------------|---------------------|-------------|-------------|------|
| <b>PN</b>  |                |                         |                          |           |            |            |             |                     |             |             |                     |             |             |      |
| 1          | PN10           | 4.43                    | 36.29                    | 2         | 6          | 7          | 0.40        | 1.58                | 0.45        | 1.13        | 0.19                | 0.06        | 0.14        | 638  |
| 2          | PN31           | 4.25                    | 43.7                     | 2         | 23         | 25         | 0.09        | 5.88                | 0.47        | 5.41        | 0.57                | 0.05        | 0.53        | 711  |
| 3          | PN32           | 4.87                    | 49.37                    | 1         | 18         | 19         | 0.06        | 3.90                | 0.21        | 3.70        | 0.38                | 0.02        | 0.36        | 687  |
| 4          | PN33           | 26.31                   | 220.97                   | 28        | 63         | 91         | 0.44        | 3.46                | 1.06        | 2.39        | 0.41                | 0.13        | 0.29        | 689  |
| 5          | PN47           | 1.45                    | 16.22                    |           | 6          | 6          |             | 4.14                | 0.00        | 4.14        | 0.37                | 0.00        | 0.37        | 719  |
| 6          | PN50           | 6.48                    | 56.75                    | 4         | 23         | 27         | 0.17        | 4.17                | 0.62        | 3.55        | 0.48                | 0.07        | 0.41        | 2406 |
|            | <b>all PN</b>  | <b>47.79</b>            | <b>423.3</b>             | <b>37</b> | <b>139</b> | <b>176</b> | <b>0.27</b> | <b>3.68</b>         | <b>0.77</b> | <b>2.91</b> | <b>0.42</b>         | <b>0.09</b> | <b>0.33</b> |      |
| <b>OSN</b> |                |                         |                          |           |            |            |             |                     |             |             |                     |             |             |      |
| 2          | OSN2           | 1.65                    | 17.97                    | 2         | -          | 2          |             | 1.21                | 1.21        | 0.00        | 0.11                | 0.11        | 0.00        | 1479 |
| 3          | OSN3           | 0.87                    | 8.48                     | 2         | 1          | 3          | 2.00        | 3.45                | 2.30        | 1.15        | 0.35                | 0.24        | 0.12        | 2592 |
| 2          | OSN4           | 1.54                    | 14.66                    | 3         | 3          | 6          | 1.00        | 3.90                | 1.95        | 1.95        | 0.41                | 0.20        | 0.20        | 2595 |
| 33         | OSN34          | 1                       | 10.51                    | 2         | 4          | 6          | 0.50        | 6.00                | 2.00        | 4.00        | 0.57                | 0.19        | 0.38        | 691  |
|            | <b>all OSN</b> | <b>5.15</b>             | <b>51.62</b>             | <b>9</b>  | <b>8</b>   | <b>17</b>  | <b>1.13</b> | <b>3.30</b>         | <b>1.75</b> | <b>1.55</b> | <b>0.33</b>         | <b>0.17</b> | <b>0.15</b> |      |

vol: neurite volume; surf: neurite surface; total: number of all synapses counted per profile; pre: presynaptic site (output synapse) post: postsynaptic site (input synapse); ratio: number of out-to-input synapses; sy: synapse; sy/ $\mu\text{m}^3$ : volumetric density ;sy/ $\mu\text{m}^2$ : surface density

**Table S8-2 DM2 synaptic configuration**

| config       | PN31      | PN32      | PN33      | PN50      |     | all PN     | percent       | sum targets | percent       |
|--------------|-----------|-----------|-----------|-----------|-----|------------|---------------|-------------|---------------|
|              | pre       | pre       | pre       | pre       |     |            |               |             |               |
| 2            |           |           | 4         |           |     | 4          | 12.1%         | 8           | 6.6%          |
| 3            | 1         | 1         | 7         |           |     | 9          | 27.3%         | 27          | 22.3%         |
| 4            | 1         |           | 14        | 2         |     | 17         | 51.5%         | 68          | 56.2%         |
| 5            |           |           | 1         |           |     | 1          | 3.0%          | 5           | 4.1%          |
| 6            |           |           | 1         |           |     | 1          | 3.0%          | 6           | 5.0%          |
| 7            |           |           | 1         |           |     | 1          | 3.0%          | 7           | 5.8%          |
| <b>total</b> | <b>2</b>  | <b>1</b>  | <b>28</b> | <b>2</b>  |     | <b>33</b>  | <b>100.0%</b> | <b>121</b>  | <b>100.0%</b> |
|              |           |           |           |           |     |            |               |             |               |
| config       | PN31      | PN32      | PN33      | PN50      |     |            |               |             |               |
|              | post      | post      | post      | post      |     |            |               |             |               |
| 2            |           |           | 7         |           |     | 7          | 5.7%          | 14          | 2.8%          |
| 3            | 4         | 3         | 19        | 10        |     | 36         | 29.3%         | 108         | 21.4%         |
| 4            | 10        | 9         | 19        | 6         |     | 44         | 35.8%         | 176         | 34.9%         |
| 5            | 5         | 4         | 11        | 2         |     | 22         | 17.9%         | 110         | 21.8%         |
| 6            | 4         | 2         | 2         | 1         |     | 9          | 7.3%          | 54          | 10.7%         |
| 7            |           |           | 1         |           |     | 1          | 0.8%          | 7           | 1.4%          |
| 8            |           |           |           | 2         |     | 2          | 1.6%          | 16          | 3.2%          |
| 9            |           |           |           |           |     | 0          | 0.0%          | 0           | 0.0%          |
| 10           |           |           | 2         |           |     | 2          | 1.6%          | 20          | 4.0%          |
| <b>total</b> | <b>23</b> | <b>18</b> | <b>61</b> | <b>21</b> |     | <b>123</b> | <b>100.0%</b> | <b>505</b>  | <b>100.0%</b> |
|              |           |           |           |           | < 7 | <b>118</b> | <b>95.9%</b>  | <b>462</b>  | <b>91.5%</b>  |
|              |           |           |           |           | > 6 | <b>5</b>   | <b>4.1%</b>   | <b>43</b>   | <b>8.5%</b>   |

**config:** synaptic configuration, e.g. 4 = tetrad, **total:** number of configurations; **sum targets:** number of all postsynaptic profiles targeted by output synapses
